# Supplementary material for: Electrochemical reduction of CO2 to CO and HCOO− using metal–cyclam complex catalysts: predicting selectivity and limiting potential from DFT
Source: Royal Society of Chemistry journal article supplement (doi:10.1039/d1dt02159a), 2021-01-01
Supplement: d1dt02159a1.pdf [file d1dt02159a1.pdf]

Supporting Information

**Electrochemical Reduction of CO<sub>2</sub> to CO and HCOO<sup>-</sup> on Metal-Cyclam  
Complex Catalysts: Selectivity and Limiting Potential from DFT**

*Zaheer Masood and Qingfeng Ge\**

Department of Chemistry and Biochemistry, Southern Illinois University, Carbondale, IL 62901,  
USA.

\*Corresponding Author: [qge@chem.siu.edu](mailto:qge@chem.siu.edu) (Q. Ge)

Table S1. Computed reduction potentials of [LM]<sup>3+</sup>

| [LCr] <sup>3+</sup> | [LMn] <sup>3+</sup> | [LFe] <sup>3+</sup> | [LCo] <sup>3+</sup> | [LRu] <sup>3+</sup> | [LRh] <sup>3+</sup> | [LOs] <sup>3+</sup> | [Llr] <sup>3+</sup> | [LCr] <sup>3+</sup> |
|---------------------|---------------------|---------------------|---------------------|---------------------|---------------------|---------------------|---------------------|---------------------|
| 1.19                | -0.06               | 1.02                | 1.46                | 0.72                | 1.99                | 0.45                | 1.17                | 1.19                |

Table S2. AIM (Bader) charges of [LM]<sup>n</sup>, [LM]<sup>(n-1)</sup> and [LM-COO]<sup>(n-1)</sup> in CO<sub>2</sub> adduct formation.

|                     | [LM] <sup>n</sup> |      | [LM] <sup>(n-1)</sup> |      | [LM-COO] <sup>(n-1)</sup> |      |      |                                      |
|---------------------|-------------------|------|-----------------------|------|---------------------------|------|------|--------------------------------------|
|                     | L                 | M    | L                     | M    | L                         | M    | L+M  | CO <sub>2</sub>                      |
| [LNi] <sup>2+</sup> | 1.23              | 0.77 | 0.44                  | 0.56 | 0.66                      | 1.00 | 1.66 | C (1.78), O (-1.22), O (1.22)=-0.66  |
| [LPd] <sup>2+</sup> | 1.31              | 0.69 | 0.68                  | 0.32 | 0.90                      | 0.66 | 1.56 | C (1.91), O (-1.24), O (-1.23)=-0.55 |

Table S3. Reaction free energies (kJ/mol) of [LM-H]<sup>(n-1)</sup> with CO<sub>2(g)</sub>, HCO<sub>3<sup>-</sup>(aq)</sub>, and CO<sub>3<sup>2-</sup>(aq)</sub>; and [LM-H]<sup>(n-1)</sup> with H<sup>+</sup> through HCO<sub>3<sup>-</sup></sub> and H<sub>2</sub>O.

| Catalyst            | $\Delta G_{rxn}^{\circ}(\text{HCOO}^-)$ |                                  |                                  | $\Delta G_{rxn}^{\circ}(\text{H}_2)$ |                                  |
|---------------------|-----------------------------------------|----------------------------------|----------------------------------|--------------------------------------|----------------------------------|
|                     | CO <sub>2(g)</sub>                      | HCO <sub>3<sup>-</sup>(aq)</sub> | CO <sub>3<sup>2-</sup>(aq)</sub> | H <sub>2</sub> O                     | HCO <sub>3<sup>-</sup>(aq)</sub> |
| [LCr] <sup>2+</sup> | -121.1                                  | -116.74                          | -95.36                           | -86.22                               | -107.6                           |
| [LCr] <sup>+</sup>  | -139.84                                 | -135.48                          | -114.1                           | -104.96                              | -126.34                          |
| [LMn] <sup>2+</sup> | -106.19                                 | -101.83                          | -80.45                           | -71.31                               | -92.69                           |
| [LMn] <sup>+</sup>  | -225.58                                 | -221.22                          | -199.84                          | -190.7                               | -212.08                          |
| [LFe] <sup>2+</sup> | -111.05                                 | -106.69                          | -85.31                           | -76.17                               | -97.55                           |
| [LFe] <sup>+</sup>  | -94.42                                  | -90.06                           | -68.68                           | -59.54                               | -80.92                           |
| [LCo] <sup>2+</sup> | -101.5                                  | -97.14                           | -75.76                           | -66.62                               | -88                              |
| [LCo] <sup>+</sup>  | -173.84                                 | -169.48                          | -148.1                           | -138.96                              | -160.34                          |
| [LMO] <sup>3+</sup> | 125.4                                   | 129.76                           | 151.14                           | 160.28                               | 138.9                            |
| [LMO] <sup>2+</sup> | -16.8                                   | -12.44                           | 8.94                             | 18.08                                | -3.3                             |
| [LMO] <sup>+</sup>  | -163.53                                 | -159.17                          | -137.79                          | -128.65                              | -150.03                          |
| [LTc] <sup>2+</sup> | -62.01                                  | -57.65                           | -36.27                           | -27.13                               | -48.51                           |
| [LTc] <sup>+</sup>  | -126.92                                 | -122.56                          | -101.18                          | -92.04                               | -113.42                          |
| [LRu] <sup>2+</sup> | 24.4                                    | 28.76                            | 50.14                            | 59.28                                | 37.9                             |

|                     |         |         |         |         |         |
|---------------------|---------|---------|---------|---------|---------|
| [LRu] <sup>+</sup>  | -116.15 | -111.79 | -90.41  | -81.27  | -102.65 |
| [LRh] <sup>2+</sup> | -74.48  | -70.12  | -48.74  | -39.6   | -60.98  |
| [LRh] <sup>+</sup>  | -149.67 | -145.31 | -123.93 | -114.79 | -136.17 |
| [LW] <sup>3+</sup>  | -20.67  | -16.31  | 5.07    | 14.21   | -7.17   |
| [LW] <sup>2+</sup>  | -82.12  | -77.76  | -56.38  | -47.24  | -68.62  |
| [LW] <sup>+</sup>   | -120.21 | -115.85 | -94.47  | -85.33  | -106.71 |
| [LRe] <sup>3+</sup> | 83.4    | 87.76   | 109.14  | 118.28  | 96.9    |
| [LRe] <sup>2+</sup> | 25.67   | 30.03   | 51.41   | 60.55   | 39.17   |
| [LRe] <sup>+</sup>  | -130.8  | -126.44 | -105.06 | -95.92  | -117.3  |
| [LOs] <sup>2+</sup> | 50.78   | 55.14   | 76.52   | 85.66   | 64.28   |
| [LOs] <sup>+</sup>  | -106.7  | -102.34 | -80.96  | -71.82  | -93.2   |
| [Llr] <sup>2+</sup> | -66.73  | -62.37  | -40.99  | -31.85  | -53.23  |
| [Llr] <sup>+</sup>  | -149.43 | -145.07 | -123.69 | -114.55 | -135.93 |
| [LPt] <sup>+</sup>  | -132.66 | -128.3  | -106.92 | -97.78  | -119.16 |

Table S4. AIM (Bader) charges of [LM-H]<sup>+</sup> and ([LM]-H-COO)<sup>+</sup> in HCOO<sup>-</sup> formation

| M  | [LM-H] <sup>+</sup> |      |       | ([LM]-H-COO) <sup>+</sup> ** |      |       |       |      |       |       |       |
|----|---------------------|------|-------|------------------------------|------|-------|-------|------|-------|-------|-------|
|    | M                   | L    | H*    | M                            | L    | total | H     | C    | O     | O     | total |
| Mo | 1.17                | 0.44 | -0.62 | 1.38                         | 0.55 | 1.94  | -0.11 | 1.83 | -1.33 | -1.33 | -0.94 |
| Rh | 0.63                | 0.90 | -0.53 | 0.85                         | 1.05 | 1.90  | -0.05 | 1.81 | -1.33 | -1.32 | -0.90 |
| Co | 0.98                | 0.72 | -0.70 | 1.08                         | 0.87 | 1.96  | -0.06 | 1.80 | -1.35 | -1.35 | -0.96 |

H\* atom bound to the metal center (M-H); [LM]-H-COO)<sup>+</sup> \*\* final structure after constrained relaxation.

Table S5(a). Spin multiplicities of the ground state of the intermediates in the hydride cycle.

| Metal center | [LM] <sup>3+</sup> | [LM] <sup>2+</sup> | [LM] <sup>+</sup> | [LM] <sup>0</sup> | [LM-H] <sup>3+</sup> | [LM-H] <sup>2+</sup> | [LM-H] <sup>+</sup> | [LM-H] <sup>0</sup> |
|--------------|--------------------|--------------------|-------------------|-------------------|----------------------|----------------------|---------------------|---------------------|
| Cr           | --                 | 4                  | 5                 | 4                 | --                   | 4                    | 5                   | 4                   |
| Mn           | --                 | 4                  | 5                 | 4                 | --                   | 7                    | 4                   | 3                   |
| Fe           | --                 | 3                  | 2                 | 3                 | --                   | 2                    | 3                   | 4                   |
| Co           | --                 | 2                  | 3                 | 2                 | --                   | 1                    | 2                   | 1                   |
| Mo           | 2                  | 1                  | 4                 | 3                 | 1                    | 4                    | 3                   | 2                   |
| Tc           | 5                  | 4                  | 3                 | 2                 | 4                    | 3                    | 2                   | 1                   |
| Ru           | --                 | 3                  | 2                 | 1                 | --                   | 2                    | 1                   | 2                   |
| Rh           | --                 | 2                  | 1                 | 2                 | --                   | 1                    | 2                   | 1                   |
| W            | 4                  | 1                  | 4                 | 3                 | 1                    | 2                    | 1                   | 4                   |
| Re           | 1                  | 2                  | 3                 | 2                 | 4                    | 2                    | 2                   | 1                   |
| Os           | --                 | 3                  | 2                 | 1                 | --                   | 2                    | 1                   | 2                   |
| Ir           | --                 | 2                  | 1                 | 2                 | --                   | 1                    | 2                   | 1                   |
| Pt           | --                 | 1                  | 2                 | --                | --                   | 2                    | 1                   | --                  |

Table S5(b). Spin multiplicities of the ground state of the intermediates in the CO cycle

| Metal center        | [LM] <sup>n</sup> | [LM] <sup>(n-1)</sup> | [LM-COO] <sup>(n-1)</sup> | [LM-COO] <sup>(n-2)</sup> | [LM-COOH] <sup>(n-1)</sup> | [LM-CO] <sup>n</sup> |
|---------------------|-------------------|-----------------------|---------------------------|---------------------------|----------------------------|----------------------|
| [LNi] <sup>2+</sup> | 3                 | 2                     | 2                         | 3                         | 3                          | 3                    |
| [LPd] <sup>2+</sup> | 1                 | 2                     | 2                         | 1                         | 1                          | 1                    |
| [LTc] <sup>3+</sup> | 5                 | 4                     | --                        | --                        | --                         | --                   |

## Section S1. Determination of pK<sub>a</sub>

**Determining pK<sub>a</sub> of carboxylate adducts:** We use an isodesmic proton exchange (IPE) reaction scheme to determine pK<sub>a</sub> of carboxylate adduct. This method has been used for different classes of acids and has an error of ± 0.40 pK<sub>a</sub> unit<sup>1</sup>. In particular, this method has been successfully applied in determining pK<sub>a</sub> of the porphyrin carboxylate adduct formed in CO<sub>2</sub> electrochemical reduction<sup>2</sup>.

Following the IPE method, pK<sub>a</sub> of an acid is calculated with reference to an acid of known pK<sub>a</sub>, as shown in eqn. S.1. ΔG°<sub>PE</sub> can be obtained from the frequency calculations of the DFT-optimized geometries of acid and its conjugate base. We used the carboxylic acids, including propanoic, succinic, 2-butyric, oxalic, tartaric, 3-chloropropanoic, glycolic, fluoroacetic, difluoroacetic and

formic acids, to determine  $\Delta G^\circ_{PE}$ . Formic acid was chosen as the reference acid. The computed  $\Delta G^\circ_{PE}$  of all acids were plotted against the experimental  $pK_a$  values<sup>3</sup> to construct the linear regression shown in Figure S1.

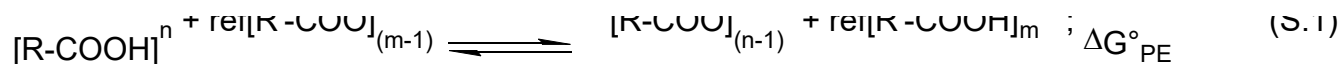

$$\Delta G^\circ_{PE} = (G^\circ_{\text{ref}}[R'-COOH]_m + G^\circ[R'-COO]_{(n-1)}) - (G^\circ[R-COOH]^n + G^\circ_{\text{ref}}[R'-COO]_{(m-1)}) \quad (S.2)$$

$$pK_a[R-COOH]^n = \frac{\Delta G^\circ_{PE}}{2.303RT} + pK_{a\text{ref}}[R'-COOH]^m \quad (S.3)$$

The linear regression of the experimental  $pK_a$  vs.  $\Delta G^\circ_{PE}$ , in Figure S1 gives  $pKa = 0.08 \Delta G^\circ_{PE} + 3.64$ . The intercept of 3.64 is close to the experimental  $pK_a$  (3.76) of formic acid. This equation was then used to determine the  $pK_a$  of a carboxylate adduct from the corresponding  $\Delta G^\circ_{PE}$  of optimized of  $[LM-COOH]^+$  and  $[LM-COO]^0$ .

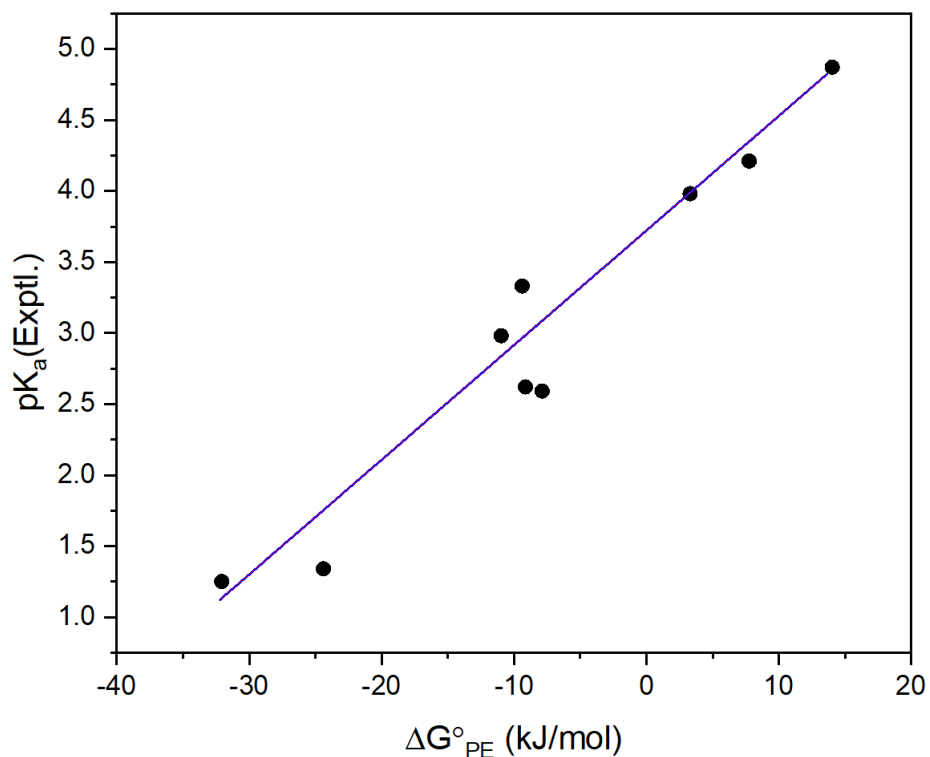

Figure S1. A plot of  $pK_a$  (experimental) values of different carboxylic acids versus  $\Delta G^\circ_{PE}$  eqn. S3 used to calculate  $pK_a$  values of carboxylate adduct for this study. ( $R^2 = 0.94$  and Intercept = 3.64 and slope = 0.08).

**Determining  $pK_a$  of proton adduct ( $[LM-H]^n$ ):** The  $pK_a$  values of  $[LM-H]^n$  was calculated using the IPE scheme shown in equations S.4-S.6. IPE has been demonstrated to determine  $pK_a$  of metal-hydrides with an accuracy of 1.50 units for metal hydrides<sup>4, 5</sup>.

The experimental  $pK_a=1.81^6$  of  $[LNi-H]^{2+}$  was used as a reference for the metal-cyclam hydride complexes reported in this study.  $\Delta G^\circ_{PE(LM-H)}$  was computed using eqn. S.5 based on the DFT optimized geometries of  $[LM-H]^n$ ,  $[LNi]^+$ ,  $[LNi-H]^{2+}$ , and  $[LM]^{(n-1)}$ .  $pK_a$  of all proton adducts can then be computed using eqn. S.6.

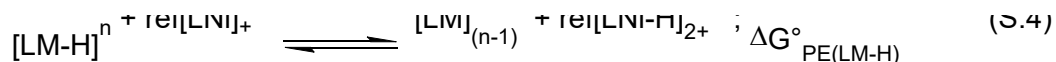

$$\Delta G^\circ_{\text{PE(LM-H)}} = (G^\circ[\text{LM}]_{(n-1)} + G^\circ_{\text{ref}[\text{LNi-H}]_{2+}}) - (G^\circ[\text{LM-H}]^n + G^\circ_{\text{ref}[\text{LNi}]_+}) \quad (\text{S.5})$$

$$\text{p}K_a[\text{LM-H}]^n = \frac{\Delta G^\circ_{\text{PE(LM-H)}}}{2.303RT} + 1.81 \quad (\text{S.6})$$

## Section S2. Determination of Reduction Potentials.

The reduction potentials have been determined using the thermochemical cycle presented in Figure S2, where  $(\text{Ox})^n$  represents oxidized species and  $(\text{Red})^{(n-1)}$  the reduced species<sup>7</sup>. This cycle utilizes the computed free energies in gas phase and water as reactants and products and includes the SHE cycle that absorbs the computational errors in the reduction potential of hydrogen electrode and proton solvation energy. The reduction potential was then calculated from eqn S.8. We used a proton solvated with six water molecules (proton-water cluster approach) to compute  $G^\circ$  for  $\text{H}^+$  as described in literature<sup>8</sup>.

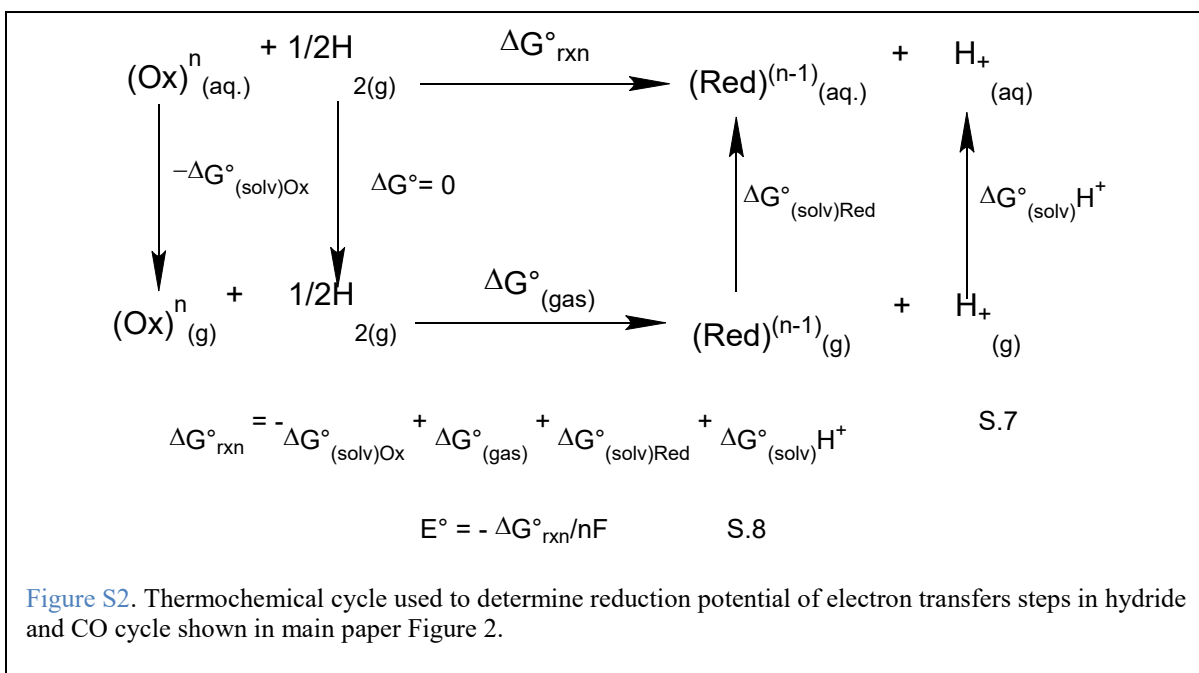

Figure S2. Thermochemical cycle used to determine reduction potential of electron transfers steps in hydride and CO cycle shown in main paper Figure 2.

A value of  $-1112.52 \text{ kJ/mol}^9$  for  $G^\circ_{\text{solv}}(\text{H}^+)$  can be reproduced using B3LYP/6-311++G(d,p) with the water cluster approach<sup>8</sup>. Using the optimized structure of proton-water cluster at B3LYP/6-311++G(d,p) level, we obtained  $G^\circ_{\text{solv}}(\text{H}^+) = -1125.96 \text{ kJ/mol}$  at B3LYP-D3/6-31G(d,p) level. We point out that the difference in solvation energy of proton will not change the predicted trends and shifts the reduction potentials only by  $\sim 50 \text{ mV}$ .

**Section S3. Thermochemical cycle.** The free energies of  $\text{OH}^-$ ,  $\text{HCO}_3^-$ ,  $\text{CO}_3^{2-}$  and  $\text{HCOO}^-$  were determined through the thermochemical cycle shown in Figure S3.

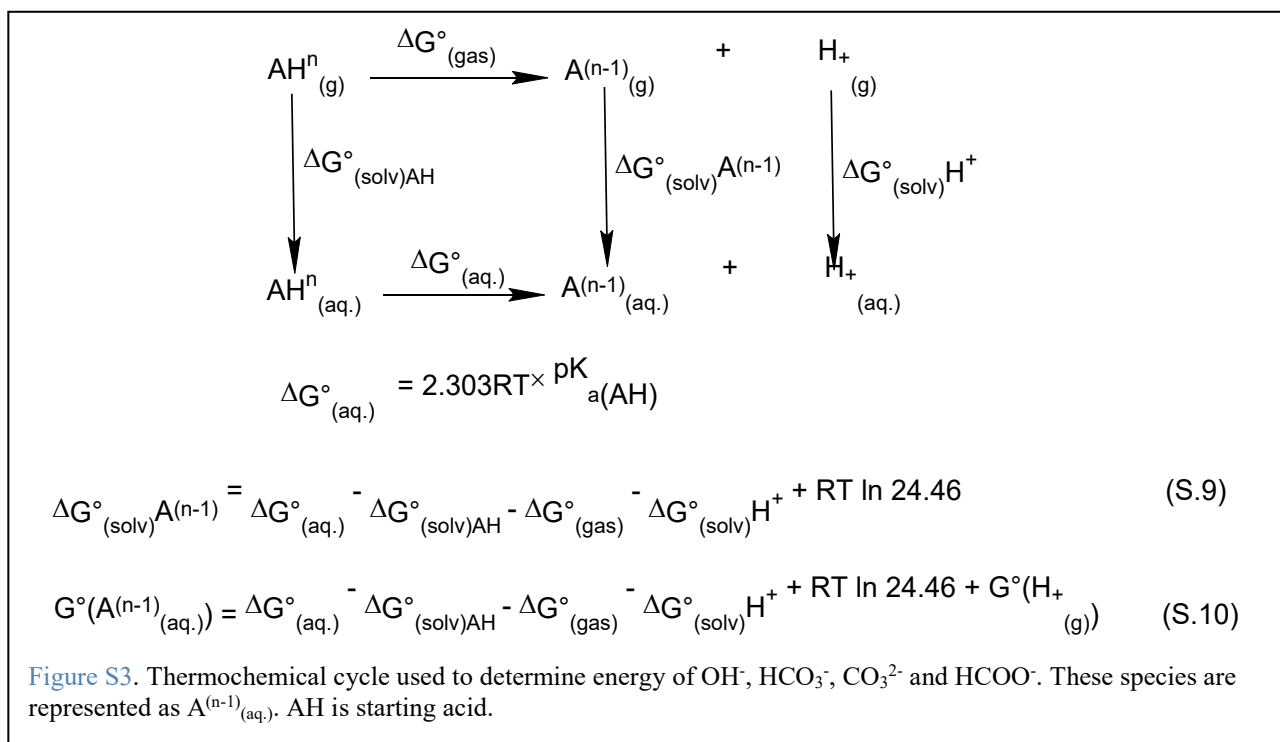



## Section S4(a). Cartesian coordinates of intermediates of CO cycle

### Ni(II)-cyclam

#### [LNi]<sup>2+</sup>

Charge = 2 Multiplicity = 3

|    |             |             |             |
|----|-------------|-------------|-------------|
| N  | 1.88513800  | 0.86465600  | 0.05018100  |
| N  | -1.01232500 | 1.80944500  | 0.03693800  |
| N  | -1.88513800 | -0.86465600 | -0.05018100 |
| N  | 1.01232500  | -1.80944500 | -0.03693800 |
| H  | 2.07117100  | 1.11485100  | 1.02463900  |
| H  | -1.01969700 | 2.12158100  | 1.01132400  |
| H  | -2.07117100 | -1.11485100 | -1.02463900 |
| H  | 1.01969700  | -2.12158100 | -1.01132400 |
| C  | 2.83620700  | -0.21094700 | -0.33185700 |
| H  | 3.86533900  | 0.05318700  | -0.06610800 |
| H  | 2.78138800  | -0.32856400 | -1.41901200 |
| C  | 2.03943200  | 2.09454100  | -0.76763800 |
| H  | 1.89026000  | 1.80851800  | -1.81413500 |
| H  | 3.06479900  | 2.47118600  | -0.66679600 |
| C  | 1.04059800  | 3.18358100  | -0.37802500 |
| H  | 1.34388400  | 4.10707500  | -0.88182400 |
| H  | 1.10130900  | 3.38051400  | 0.70091400  |
| C  | -0.40589500 | 2.89348600  | -0.77667500 |
| H  | -1.01189300 | 3.80270800  | -0.67878600 |
| H  | -0.44790400 | 2.57523300  | -1.82356000 |
| C  | -2.41321500 | 1.50306800  | -0.35012800 |
| H  | -2.43533100 | 1.37614400  | -1.43730800 |
| H  | -3.08838100 | 2.32392000  | -0.08578100 |
| C  | -2.83620700 | 0.21094700  | 0.33185700  |
| H  | -3.86533900 | -0.05318700 | 0.06610800  |
| H  | -2.78138800 | 0.32856400  | 1.41901200  |
| C  | -2.03943200 | -2.09454100 | 0.76763800  |
| H  | -1.89026000 | -1.80851800 | 1.81413500  |
| H  | -3.06479900 | -2.47118600 | 0.66679600  |
| C  | -1.04059800 | -3.18358100 | 0.37802500  |
| H  | -1.34388400 | -4.10707500 | 0.88182400  |
| H  | -1.10130900 | -3.38051400 | -0.70091400 |
| C  | 0.40589500  | -2.89348600 | 0.77667500  |
| H  | 1.01189300  | -3.80270800 | 0.67878600  |
| H  | 0.44790400  | -2.57523300 | 1.82356000  |
| C  | 2.41321500  | -1.50306800 | 0.35012800  |
| H  | 2.43533100  | -1.37614400 | 1.43730800  |
| H  | 3.08838100  | -2.32392000 | 0.08578100  |
| Ni | 0.00000000  | 0.00000000  | 0.00000000  |

#### [LNi]<sup>+</sup>

Charge = 1 Multiplicity = 2

|   |             |             |             |
|---|-------------|-------------|-------------|
| N | 1.90776200  | 0.87008200  | 0.05286900  |
| N | -1.02735300 | 1.82850400  | 0.04439000  |
| N | -1.90776200 | -0.87008200 | -0.05286900 |

|    |             |             |             |
|----|-------------|-------------|-------------|
| N  | 1.02735300  | -1.82850400 | -0.04439000 |
| H  | 2.11062600  | 1.12365100  | 1.02138300  |
| H  | -1.04745900 | 2.15491000  | 1.01209500  |
| H  | -2.11062600 | -1.12365100 | -1.02138300 |
| H  | 1.04745900  | -2.15491000 | -1.01209500 |
| C  | 2.84281900  | -0.20954800 | -0.33201200 |
| H  | 3.88357500  | 0.03288700  | -0.07822900 |
| H  | 2.78303100  | -0.33053000 | -1.41928800 |
| C  | 2.04812100  | 2.09448700  | -0.76443500 |
| H  | 1.89365800  | 1.81024900  | -1.81139500 |
| H  | 3.06901200  | 2.49646500  | -0.68166300 |
| C  | 1.03891000  | 3.17875600  | -0.37371700 |
| H  | 1.34366000  | 4.10840300  | -0.86712800 |
| H  | 1.09774800  | 3.36821500  | 0.70720900  |
| C  | -0.41348400 | 2.89800800  | -0.77160100 |
| H  | -1.00089800 | 3.82517000  | -0.69412900 |
| H  | -0.45079600 | 2.57525300  | -1.81810000 |
| C  | -2.41680300 | 1.50761200  | -0.34815600 |
| H  | -2.43315500 | 1.37247400  | -1.43528400 |
| H  | -3.11552900 | 2.31796200  | -0.10023900 |
| C  | -2.84281900 | 0.20954800  | 0.33201200  |
| H  | -3.88357500 | -0.03288700 | 0.07822900  |
| H  | -2.78303100 | 0.33053000  | 1.41928800  |
| C  | -2.04812100 | -2.09448700 | 0.76443500  |
| H  | -1.89365800 | -1.81024900 | 1.81139500  |
| H  | -3.06901200 | -2.49646500 | 0.68166300  |
| C  | -1.03891000 | -3.17875600 | 0.37371700  |
| H  | -1.34366000 | -4.10840300 | 0.86712800  |
| H  | -1.09774800 | -3.36821500 | -0.70720900 |
| C  | 0.41348400  | -2.89800800 | 0.77160100  |
| H  | 1.00089800  | -3.82517000 | 0.69412900  |
| H  | 0.45079600  | -2.57525300 | 1.81810000  |
| C  | 2.41680300  | -1.50761200 | 0.34815600  |
| H  | 2.43315500  | -1.37247400 | 1.43528400  |
| H  | 3.11552900  | -2.31796200 | 0.10023900  |
| Ni | 0.00000000  | 0.00000000  | 0.00000000  |

**[LNi-COO]<sup>+</sup>**

Charge = 1 Multiplicity = 2

|   |             |             |             |
|---|-------------|-------------|-------------|
| N | 1.43121400  | -1.56969600 | -0.01158200 |
| N | 1.43111000  | 1.56977100  | -0.01167000 |
| N | -1.29968400 | 1.47758500  | -0.70570800 |
| N | -1.29957600 | -1.47765300 | -0.70573600 |
| H | 1.48149100  | -1.79506400 | 0.98259300  |
| H | 1.48153700  | 1.79515000  | 0.98249400  |
| H | -1.33563900 | 1.40949500  | -1.72575700 |
| H | -1.33552300 | -1.40954700 | -1.72578500 |
| C | 0.80011000  | -2.71880600 | -0.70746600 |
| H | 1.29394600  | -3.66400100 | -0.45213000 |
| H | 0.91998400  | -2.55595300 | -1.78414000 |
| C | 2.80575200  | -1.28716800 | -0.48550300 |
| H | 2.76639900  | -1.19793900 | -1.57662100 |
| H | 3.45986000  | -2.13699100 | -0.24946100 |
| C | 3.37977000  | 0.00011900  | 0.11241300  |

|    |             |             |             |
|----|-------------|-------------|-------------|
| H  | 4.45928200  | 0.00016700  | -0.07201000 |
| H  | 3.24714700  | 0.00023900  | 1.20278700  |
| C  | 2.80556100  | 1.28719000  | -0.48579900 |
| H  | 3.45966900  | 2.13712400  | -0.25015100 |
| H  | 2.76597700  | 1.19762800  | -1.57688200 |
| C  | 0.79991600  | 2.71886900  | -0.70748800 |
| H  | 0.91975400  | 2.55606600  | -1.78417200 |
| H  | 1.29371200  | 3.66408100  | -0.45213600 |
| C  | -0.68488400 | 2.77901400  | -0.36314100 |
| H  | -1.16631900 | 3.60659600  | -0.89793800 |
| H  | -0.81781600 | 2.93683200  | 0.70887000  |
| C  | -2.67977600 | 1.29780700  | -0.19781100 |
| H  | -2.62853300 | 1.29419500  | 0.89493000  |
| H  | -3.30379400 | 2.14965300  | -0.50041100 |
| C  | -3.31224500 | -0.00010100 | -0.70783700 |
| H  | -4.36360400 | -0.00014300 | -0.40161900 |
| H  | -3.30780600 | -0.00008100 | -1.80693900 |
| C  | -2.67968700 | -1.29798100 | -0.19785100 |
| H  | -3.30364300 | -2.14985900 | -0.50048600 |
| H  | -2.62845300 | -1.29439700 | 0.89488900  |
| C  | -0.68470000 | -2.77905100 | -0.36318500 |
| H  | -0.81766700 | -2.93691400 | 0.70881500  |
| H  | -1.16605800 | -3.60664900 | -0.89802900 |
| Ni | 0.06142200  | 0.00001000  | -0.13707300 |
| C  | -0.32223200 | 0.00003400  | 1.90988100  |
| O  | -0.39368700 | 1.14910800  | 2.33272000  |
| O  | -0.39390100 | -1.14905600 | 2.33264400  |

**[LNi-COO]<sup>0</sup>**

Charge = 1 Multiplicity = 2

|   |             |             |             |
|---|-------------|-------------|-------------|
| N | -1.43121400 | 1.56969600  | -0.01158200 |
| N | -1.43111000 | -1.56977100 | -0.01167000 |
| N | 1.29968400  | -1.47758500 | -0.70570800 |
| N | 1.29957600  | 1.47765300  | -0.70573600 |
| H | -1.48149100 | 1.79506400  | 0.98259300  |
| H | -1.48153700 | -1.79515000 | 0.98249400  |
| H | 1.33563900  | -1.40949500 | -1.72575700 |
| H | 1.33552300  | 1.40954700  | -1.72578500 |
| C | -0.80011000 | 2.71880600  | -0.70746600 |
| H | -1.29394600 | 3.66400100  | -0.45213000 |
| H | -0.91998400 | 2.55595300  | -1.78414000 |
| C | -2.80575200 | 1.28716800  | -0.48550300 |
| H | -2.76639900 | 1.19793900  | -1.57662100 |
| H | -3.45986000 | 2.13699100  | -0.24946100 |
| C | -3.37977000 | -0.00011900 | 0.11241300  |
| H | -4.45928200 | -0.00016600 | -0.07201000 |
| H | -3.24714700 | -0.00023900 | 1.20278700  |
| C | -2.80556100 | -1.28719000 | -0.48579900 |
| H | -3.45966900 | -2.13712400 | -0.25015100 |
| H | -2.76597700 | -1.19762800 | -1.57688200 |
| C | -0.79991700 | -2.71886900 | -0.70748800 |
| H | -0.91975500 | -2.55606600 | -1.78417200 |
| H | -1.29371300 | -3.66408100 | -0.45213600 |
| C | 0.68488300  | -2.77901400 | -0.36314100 |
| H | 1.16631800  | -3.60659600 | -0.89793800 |

|    |            |             |             |
|----|------------|-------------|-------------|
| H  | 0.81781500 | -2.93683200 | 0.70887000  |
| C  | 2.67977600 | -1.29780700 | -0.19781100 |
| H  | 2.62853300 | -1.29419500 | 0.89493000  |
| H  | 3.30379300 | -2.14965400 | -0.50041100 |
| C  | 3.31224500 | 0.00010000  | -0.70783700 |
| H  | 4.36360400 | 0.00014200  | -0.40161900 |
| H  | 3.30780600 | 0.00008000  | -1.80693900 |
| C  | 2.67968700 | 1.29798100  | -0.19785100 |
| H  | 3.30364300 | 2.14985800  | -0.50048600 |
| H  | 2.62845300 | 1.29439700  | 0.89488900  |
| C  | 0.68470000 | 2.77905100  | -0.36318500 |
| H  | 0.81766700 | 2.93691400  | 0.70881500  |
| H  | 1.16605800 | 3.60664900  | -0.89802900 |
| Ni | -0.0614220 | -0.00001000 | -0.13707300 |
| C  | 0.32223200 | -0.00003400 | 1.90988100  |
| O  | 0.39368700 | -1.14910800 | 2.33272000  |
| O  | 0.39390100 | 1.14905600  | 2.33264400  |

**[LNi-COOH]<sup>+</sup>**

Charge = 1, Multiplicity = 3

|   |             |             |             |
|---|-------------|-------------|-------------|
| N | -1.30805300 | -1.48897000 | -0.76548700 |
| N | -1.23276700 | 1.49365000  | -0.83411500 |
| N | 1.49365100  | 1.52749900  | -0.08018900 |
| N | 1.41667100  | -1.62200000 | -0.01228300 |
| H | -1.30086100 | -1.48483900 | -1.78745500 |
| H | -1.23031900 | 1.43905600  | -1.85470300 |
| H | 1.56225800  | 1.75052200  | 0.91363300  |
| H | 1.48534600  | -1.80805600 | 0.98918300  |
| C | -0.73419900 | -2.77389500 | -0.31074900 |
| H | -1.23788000 | -3.63224300 | -0.77288900 |
| H | -0.87621000 | -2.83225900 | 0.77176500  |
| C | -2.69919600 | -1.25068500 | -0.32112700 |
| H | -2.68900200 | -1.21055200 | 0.77205800  |
| H | -3.33962600 | -2.09203400 | -0.62025400 |
| C | -3.27022500 | 0.05046800  | -0.89239700 |
| H | -4.33571800 | 0.08366300  | -0.64122800 |
| H | -3.21042600 | 0.02656300  | -1.98951100 |
| C | -2.63136300 | 1.34299800  | -0.37565000 |
| H | -3.23068100 | 2.20305000  | -0.70511700 |
| H | -2.61793500 | 1.34607700  | 0.71905500  |
| C | -0.59746100 | 2.77078800  | -0.44361800 |
| H | -0.74155800 | 2.89608600  | 0.63270600  |
| H | -1.05631200 | 3.62685000  | -0.95397800 |
| C | 0.89086900  | 2.69453500  | -0.76884400 |
| H | 1.39356400  | 3.63041200  | -0.49579500 |
| H | 1.02103100  | 2.54595400  | -1.84644000 |
| C | 2.85214300  | 1.19941200  | -0.56799100 |
| H | 2.79535300  | 1.09628200  | -1.65730100 |
| H | 3.53559100  | 2.03242700  | -0.35396900 |
| C | 3.40359500  | -0.09422100 | 0.03833000  |
| H | 4.47799600  | -0.12549700 | -0.17223300 |
| H | 3.30035500  | -0.07166800 | 1.13164600  |
| C | 2.78533500  | -1.37921200 | -0.52046900 |
| H | 3.42852700  | -2.23728900 | -0.28216500 |

|    |             |             |             |
|----|-------------|-------------|-------------|
| H  | 2.72403300  | -1.31063800 | -1.61227400 |
| C  | 0.75344700  | -2.78742600 | -0.64590800 |
| H  | 0.88394700  | -2.69295200 | -1.72955800 |
| H  | 1.21141600  | -3.73367500 | -0.33315100 |
| Ni | 0.04297400  | -0.01249400 | -0.10809600 |
| C  | -0.38470200 | -0.00815100 | 1.87206000  |
| O  | -0.68009900 | -0.97623200 | 2.58290100  |
| O  | -0.25843000 | 1.21235300  | 2.52835700  |
| H  | -0.44392000 | 1.05672500  | 3.47729800  |

**[LNi-CO]<sup>2+</sup>**

Charge = 2 Multiplicity= 3

|    |             |             |             |
|----|-------------|-------------|-------------|
| N  | -1.39076700 | -1.18504100 | -0.74428200 |
| N  | -1.40327800 | 1.32039800  | -0.52774900 |
| N  | 1.43515200  | 1.29460600  | -0.06531200 |
| N  | 1.44766300  | -1.21083300 | -0.28184400 |
| H  | -1.39208000 | -1.09894300 | -1.74056700 |
| H  | -1.40459100 | 1.40649600  | -1.52403500 |
| H  | 1.43646500  | 1.20850900  | 0.93097400  |
| H  | 1.44897600  | -1.29693000 | 0.71444200  |
| C  | -0.69119700 | -2.41949300 | -0.36005600 |
| H  | -1.19171500 | -3.26173800 | -0.79017900 |
| H  | -0.68979200 | -2.51161700 | 0.70597000  |
| C  | -2.77603500 | -1.23425500 | -0.25488300 |
| H  | -2.77463000 | -1.32637900 | 0.81114300  |
| H  | -3.27655200 | -2.07650000 | -0.68500500 |
| C  | -3.50891700 | 0.05898100  | -0.65740400 |
| H  | -4.51724200 | 0.02315900  | -0.30117500 |
| H  | -3.51032200 | 0.15110500  | -1.72343000 |
| C  | -2.78854600 | 1.27118400  | -0.03835000 |
| H  | -3.29775700 | 2.16973100  | -0.31802400 |
| H  | -2.78714100 | 1.17906000  | 1.02767600  |
| C  | -0.71565100 | 2.47750100  | 0.06316700  |
| H  | -0.71424600 | 2.38537700  | 1.12919300  |
| H  | -1.22486200 | 3.37604800  | -0.21650800 |
| C  | 0.73558200  | 2.52905800  | -0.44953700 |
| H  | 1.23610000  | 3.37130300  | -0.01941500 |
| H  | 0.73417700  | 2.62118300  | -1.51556300 |
| C  | 2.82042000  | 1.34382000  | -0.55471100 |
| H  | 2.81901500  | 1.43594400  | -1.62073700 |
| H  | 3.32093800  | 2.18606500  | -0.12458800 |
| C  | 3.55330300  | 0.05058400  | -0.15218900 |
| H  | 4.56162700  | 0.08640700  | -0.50841800 |
| H  | 3.55470700  | -0.04154000 | 0.91383700  |
| C  | 2.83293100  | -1.16161900 | -0.77124300 |
| H  | 3.34214200  | -2.06016600 | -0.49156900 |
| H  | 2.83152600  | -1.06949400 | -1.83726900 |
| C  | 0.76003600  | -2.36793600 | -0.87276000 |
| H  | 0.75863100  | -2.27581100 | -1.93878600 |
| H  | 1.26924700  | -3.26648300 | -0.59308600 |
| Ni | -0.15921300 | 0.07705300  | 0.26282700  |
| C  | 0.06609300  | -0.42552800 | 2.10213400  |
| O  | 0.19698100  | -0.71749500 | 3.17065700  |

**Pd (II)-cyclam**

**[LPd]<sup>2+</sup>**

Charge = 2 Multiplicity = 1

|    |             |             |             |
|----|-------------|-------------|-------------|
| N  | -1.37013700 | 1.53825600  | 0.29604600  |
| N  | -1.37013200 | -1.53825900 | 0.29604800  |
| N  | 1.37017300  | -1.53828900 | -0.29600600 |
| N  | 1.37016800  | 1.53829300  | -0.29600600 |
| H  | -1.46528300 | 1.62972700  | 1.31077900  |
| H  | -1.46528000 | -1.62973200 | 1.31078100  |
| H  | 1.46543100  | -1.62985700 | -1.31071900 |
| H  | 1.46543200  | 1.62986300  | -1.31071800 |
| C  | -0.72902400 | 2.78795300  | -0.21264400 |
| H  | -1.25169800 | 3.66925700  | 0.17260600  |
| H  | -0.81020900 | 2.78433300  | -1.30351500 |
| C  | -2.72575200 | 1.29213200  | -0.26249600 |
| H  | -2.63197300 | 1.25442100  | -1.35181100 |
| H  | -3.36449600 | 2.14507200  | -0.00502900 |
| C  | -3.35080400 | -0.00000400 | 0.26653300  |
| H  | -4.40306600 | -0.00000600 | -0.03411500 |
| H  | -3.33796300 | -0.00000500 | 1.36465500  |
| C  | -2.72574700 | -1.29213800 | -0.26249600 |
| H  | -3.36449000 | -2.14508000 | -0.00503300 |
| H  | -2.63196600 | -1.25442500 | -1.35181200 |
| C  | -0.72901600 | -2.78795500 | -0.21264300 |
| H  | -0.81020300 | -2.78433500 | -1.30351400 |
| H  | -1.25168900 | -3.66926000 | 0.17260800  |
| C  | 0.72902000  | -2.78795000 | 0.21273000  |
| H  | 1.25168600  | -3.66928600 | -0.17246200 |
| H  | 0.81019100  | -2.78427200 | 1.30360200  |
| C  | 2.72572900  | -1.29212300 | 0.26266300  |
| H  | 2.63184300  | -1.25437700 | 1.35196800  |
| H  | 3.36451400  | -2.14506100 | 0.00528900  |
| C  | 3.35081600  | 0.00000500  | -0.26633400 |
| H  | 4.40305700  | 0.00000600  | 0.03438900  |
| H  | 3.33805100  | 0.00000700  | -1.36445700 |
| C  | 2.72572300  | 1.29212700  | 0.26266800  |
| H  | 3.36450700  | 2.14506800  | 0.00530300  |
| H  | 2.63183200  | 1.25437500  | 1.35197300  |
| C  | 0.72901200  | 2.78795200  | 0.21273000  |
| H  | 0.81018300  | 2.78427400  | 1.30360200  |
| H  | 1.25167600  | 3.66928900  | -0.17246200 |
| Pd | -0.00000700 | 0.00000000  | -0.00014700 |

**[LPd]<sup>+</sup>**

Charge = 1 Multiplicity = 2

|   |             |             |             |
|---|-------------|-------------|-------------|
| N | -1.43273100 | 1.66496100  | 0.34174600  |
| N | -1.43280800 | -1.66495300 | 0.34177000  |
| N | 1.43288400  | -1.66531000 | -0.34195000 |
| N | 1.43296500  | 1.66530800  | -0.34197900 |
| H | -1.58446300 | 1.81339300  | 1.33890500  |
| H | -1.58458300 | -1.81342000 | 1.33891600  |

|    |             |             |             |
|----|-------------|-------------|-------------|
| H  | 1.58555200  | -1.81457800 | -1.33883600 |
| H  | 1.58570300  | 1.81463200  | -1.33884600 |
| C  | -0.74063000 | 2.85525700  | -0.20612300 |
| H  | -1.21299100 | 3.79032600  | 0.12471600  |
| H  | -0.81464400 | 2.81551400  | -1.29832600 |
| C  | -2.73313000 | 1.32266400  | -0.27622900 |
| H  | -2.57919100 | 1.25314500  | -1.35873400 |
| H  | -3.46272100 | 2.12829900  | -0.10310200 |
| C  | -3.32590000 | 0.00004700  | 0.25123000  |
| H  | -4.38623500 | 0.00006700  | -0.02573000 |
| H  | -3.29980900 | 0.00003900  | 1.34980700  |
| C  | -2.73316700 | -1.32258000 | -0.27624700 |
| H  | -3.46280300 | -2.12818800 | -0.10317600 |
| H  | -2.57918200 | -1.25303500 | -1.35874400 |
| C  | -0.74071700 | -2.85524100 | -0.20612700 |
| H  | -0.81472800 | -2.81547000 | -1.29832900 |
| H  | -1.21308600 | -3.79031600 | 0.12468300  |
| C  | 0.74043500  | -2.85530900 | 0.20625700  |
| H  | 1.21264300  | -3.79056400 | -0.12424400 |
| H  | 0.81438500  | -2.81523300 | 1.29845000  |
| C  | 2.73283500  | -1.32265400 | 0.27688800  |
| H  | 2.57814000  | -1.25295500 | 1.35927100  |
| H  | 3.46266000  | -2.12821800 | 0.10443400  |
| C  | 3.32581600  | -0.00004700 | -0.25036200 |
| H  | 4.38603200  | -0.00006600 | 0.02706100  |
| H  | 3.30020300  | -0.00003300 | -1.34894600 |
| C  | 2.73286300  | 1.32255900  | 0.27692200  |
| H  | 3.46273700  | 2.12809900  | 0.10455600  |
| H  | 2.57810000  | 1.25281200  | 1.35929200  |
| C  | 0.74052200  | 2.85529400  | 0.20626300  |
| H  | 0.81446500  | 2.81518200  | 1.29845500  |
| H  | 1.21273800  | 3.79055700  | -0.12420200 |
| Pd | 0.00011600  | 0.00000100  | -0.00041900 |

**[LPd-COO]<sup>+</sup>**

Charge = 1 Multiplicity = 2

|   |             |             |             |
|---|-------------|-------------|-------------|
| N | -1.37013300 | -1.61869300 | -0.66155200 |
| N | -1.37053800 | 1.61840000  | -0.66158900 |
| N | 1.46886000  | 1.68950000  | 0.01137200  |
| N | 1.46927300  | -1.68921100 | 0.01138700  |
| H | -1.34749100 | -1.67128300 | -1.68106600 |
| H | -1.34792200 | 1.67100500  | -1.68110200 |
| H | 1.68618600  | 1.84325900  | 0.99507800  |
| H | 1.68657100  | -1.84286100 | 0.99511700  |
| C | -0.73743500 | -2.84344600 | -0.12213300 |
| H | -1.23119800 | -3.75230800 | -0.49075100 |
| H | -0.83590400 | -2.82280100 | 0.96837500  |
| C | -2.75815600 | -1.32559400 | -0.24631100 |
| H | -2.77865100 | -1.28890200 | 0.84502700  |
| H | -3.42340800 | -2.13960500 | -0.56769700 |
| C | -3.28168200 | -0.00037500 | -0.83618300 |
| H | -4.36756800 | -0.00050000 | -0.69147500 |
| H | -3.12009800 | -0.00035100 | -1.92358000 |
| C | -2.75846800 | 1.32496100  | -0.24629900 |

|    |             |             |             |
|----|-------------|-------------|-------------|
| H  | -3.42393600 | 2.13880500  | -0.56765800 |
| H  | -2.77892600 | 1.28825100  | 0.84504500  |
| C  | -0.73809000 | 2.84327100  | -0.12215500 |
| H  | -0.83654500 | 2.82258500  | 0.96835500  |
| H  | -1.23203400 | 3.75204600  | -0.49075000 |
| C  | 0.74474900  | 2.87010800  | -0.52459500 |
| H  | 1.20455100  | 3.80632800  | -0.18661000 |
| H  | 0.81963100  | 2.83795400  | -1.61680600 |
| C  | 2.71378900  | 1.31917600  | -0.70254600 |
| H  | 2.46957300  | 1.23432900  | -1.76725500 |
| H  | 3.45365800  | 2.12535200  | -0.60056600 |
| C  | 3.33987300  | 0.00036400  | -0.20623800 |
| H  | 4.37788700  | 0.00049500  | -0.55587900 |
| H  | 3.38552200  | 0.00038700  | 0.89013200  |
| C  | 2.71413000  | -1.31862800 | -0.70249900 |
| H  | 3.45419900  | -2.12461600 | -0.60046700 |
| H  | 2.46992400  | -1.23388500 | -1.76721900 |
| C  | 0.74541600  | -2.86997400 | -0.52455800 |
| H  | 0.82029600  | -2.83781000 | -1.61677000 |
| H  | 1.20541200  | -3.80609900 | -0.18656900 |
| C  | -0.14751000 | 0.00002100  | 1.98698000  |
| O  | -1.32574800 | 0.00036800  | 2.30686000  |
| O  | 0.96070900  | -0.00029600 | 2.50779000  |
| Pd | 0.04801400  | 0.00000800  | -0.11848300 |

### [LPd-COO]<sup>0</sup>

Charge = 0 Multiplicity = 1

|   |             |             |             |
|---|-------------|-------------|-------------|
| N | 0.87064300  | 1.72010300  | -0.51282900 |
| N | 1.90124700  | -1.15252200 | -0.63265800 |
| N | -0.71608800 | -2.12143600 | 0.09304600  |
| N | -1.98026000 | 1.24364900  | -0.76298900 |
| H | 0.85679700  | 1.32669700  | -1.45484600 |
| H | 1.86944300  | -1.24160800 | -1.64828100 |
| H | -1.27243800 | -2.49573200 | 0.85896200  |
| H | -2.43828700 | 1.43290800  | 0.12086500  |
| C | -0.10059900 | 2.83506400  | -0.53017300 |
| H | 0.33927100  | 3.72452200  | -1.00475000 |
| H | -0.35619300 | 3.09346400  | 0.50149400  |
| C | 2.28299500  | 2.05152200  | -0.22989700 |
| H | 2.41535300  | 2.14181700  | 0.85369300  |
| H | 2.54476100  | 3.02228100  | -0.67739700 |
| C | 3.22758200  | 0.98809300  | -0.81377600 |
| H | 4.25273100  | 1.33806200  | -0.65044800 |
| H | 3.08534500  | 0.95010800  | -1.90345400 |
| C | 3.13811400  | -0.43515500 | -0.24577200 |
| H | 4.02385700  | -1.00206300 | -0.56970400 |
| H | 3.16154000  | -0.39561300 | 0.84958400  |
| C | 1.78931600  | -2.49298900 | -0.01792900 |
| H | 1.97961000  | -2.37480900 | 1.05380300  |
| H | 2.54077300  | -3.19396600 | -0.41180100 |
| C | 0.39484100  | -3.08652900 | -0.22929600 |
| H | 0.29159800  | -3.98410700 | 0.38684400  |
| H | 0.29036700  | -3.39520400 | -1.27373100 |



|    |             |             |             |
|----|-------------|-------------|-------------|
| C  | -1.62139500 | -1.97648700 | -1.10016000 |
| H  | -0.99486900 | -1.61511500 | -1.92196000 |
| H  | -1.95555500 | -2.98542300 | -1.37720600 |
| C  | -2.86140600 | -1.06939400 | -0.94601800 |
| H  | -3.69739000 | -1.58562000 | -1.43162700 |
| H  | -3.13187000 | -0.97358900 | 0.11094600  |
| C  | -2.76532000 | 0.33635600  | -1.58035800 |
| H  | -3.79243300 | 0.69966100  | -1.76971200 |
| H  | -2.28363400 | 0.25448500  | -2.56302900 |
| C  | -1.35934900 | 2.42967900  | -1.32245600 |
| H  | -1.05950400 | 2.20309000  | -2.35408300 |
| H  | -2.02497200 | 3.30887900  | -1.37620800 |
| C  | -0.95822700 | 0.50243500  | 1.95554400  |
| O  | -0.37170300 | 1.44259600  | 2.57575600  |
| O  | -2.06333700 | -0.02796200 | 2.25409700  |
| Pd | 0.15886800  | -0.17161600 | 0.48006500  |

**[LPd-COOH]<sup>+</sup>**

Charge = 1 Multiplicity = 1

|   |             |             |             |
|---|-------------|-------------|-------------|
| N | 1.53304100  | 1.57886800  | -0.57162300 |
| N | 1.78958300  | -1.48245700 | -0.02166000 |
| N | -1.00068500 | -1.69024600 | -0.21224300 |
| N | -1.24507200 | 1.26024000  | -0.72913000 |
| H | 1.87394200  | 1.60032800  | -1.53570900 |
| H | 2.16614800  | -1.77932600 | -0.92510400 |
| H | -1.37631400 | -1.48961500 | 0.73187100  |
| H | -1.60117700 | 1.32955700  | 0.26547500  |
| C | 0.64675400  | 2.76537100  | -0.37113000 |
| H | 1.15430600  | 3.68186000  | -0.69032600 |
| H | 0.43293800  | 2.83887700  | 0.69886400  |
| C | 2.71656800  | 1.56657900  | 0.32710100  |
| H | 2.35106400  | 1.66973000  | 1.35325000  |
| H | 3.33490200  | 2.44277600  | 0.09860400  |
| C | 3.55173900  | 0.29186500  | 0.18979300  |
| H | 4.49714100  | 0.46533900  | 0.71366700  |
| H | 3.80525300  | 0.11900200  | -0.86448300 |
| C | 2.92155600  | -0.96626200 | 0.79120100  |
| H | 3.67709900  | -1.75625100 | 0.87716300  |
| H | 2.53771500  | -0.75548400 | 1.79407500  |
| C | 1.09849000  | -2.65469300 | 0.59456100  |
| H | 0.86471400  | -2.39329300 | 1.63059600  |
| H | 1.75469600  | -3.53141400 | 0.59635100  |
| C | -0.17961700 | -2.93078000 | -0.18140400 |
| H | -0.74168900 | -3.75258000 | 0.27549000  |
| H | 0.05454100  | -3.20729000 | -1.21433400 |
| C | -2.12748800 | -1.74161900 | -1.17454800 |
| H | -1.70987300 | -1.87495200 | -2.17787200 |
| H | -2.74018100 | -2.62253800 | -0.94468600 |
| C | -3.00205900 | -0.48772500 | -1.11506100 |
| H | -3.87750000 | -0.67047200 | -1.74651000 |
| H | -3.37030300 | -0.34632000 | -0.09279300 |
| C | -2.34358900 | 0.80318400  | -1.61038200 |

|    |             |             |             |
|----|-------------|-------------|-------------|
| H  | -3.10080800 | 1.59644900  | -1.65990500 |
| H  | -1.94042600 | 0.66540200  | -2.61969100 |
| C  | -0.64071800 | 2.55003200  | -1.15140000 |
| H  | -0.43061000 | 2.49833600  | -2.22512700 |
| H  | -1.33945300 | 3.37686900  | -0.97961700 |
| C  | -1.87700200 | 0.74159500  | 2.11309300  |
| O  | -1.99098300 | 1.47252600  | 3.29844000  |
| O  | -1.73875600 | -0.48952300 | 2.30035700  |
| H  | -1.94387100 | 0.83264400  | 4.04376700  |
| Pd | 0.29086500  | -0.08895200 | -0.43308100 |

**[LPd-CO]<sup>2+</sup>**

|    |             |             |             |
|----|-------------|-------------|-------------|
| 2  | 1           |             |             |
| N  | -1.34738400 | -1.40647800 | -0.73074400 |
| N  | -1.28592900 | 1.65820500  | -0.45507500 |
| N  | 1.43109000  | 1.53681700  | 0.23470600  |
| N  | 1.36850900  | -1.52161200 | -0.03777200 |
| H  | -1.39615300 | -1.41309400 | -1.75269500 |
| H  | -1.33367900 | 1.84576900  | -1.45999100 |
| H  | 1.49059600  | 1.52080700  | 1.25626200  |
| H  | 1.42484700  | -1.68734600 | 0.97052500  |
| C  | -0.75577700 | -2.70627500 | -0.29220000 |
| H  | -1.28270300 | -3.54269100 | -0.76214800 |
| H  | -0.88191900 | -2.77894400 | 0.79168700  |
| C  | -2.72231800 | -1.17706300 | -0.21294600 |
| H  | -2.67939200 | -1.24137300 | 0.87813500  |
| H  | -3.36548400 | -1.98718600 | -0.57578100 |
| C  | -3.29520600 | 0.17255500  | -0.64877500 |
| H  | -4.35993300 | 0.17142900  | -0.39554600 |
| H  | -3.23231000 | 0.27136100  | -1.74047700 |
| C  | -2.66812400 | 1.39490500  | 0.02350300  |
| H  | -3.27717200 | 2.28349900  | -0.17932300 |
| H  | -2.61984700 | 1.25415100  | 1.10725800  |
| C  | -0.64080800 | 2.83603100  | 0.19895500  |
| H  | -0.76624800 | 2.72461100  | 1.27980200  |
| H  | -1.13052400 | 3.76287500  | -0.11617800 |
| C  | 0.83297600  | 2.84464200  | -0.16880700 |
| H  | 1.35661000  | 3.67101200  | 0.32211100  |
| H  | 0.95825900  | 2.94761200  | -1.25072900 |
| C  | 2.79711700  | 1.31141100  | -0.30595000 |
| H  | 2.73493300  | 1.37463700  | -1.39641700 |
| H  | 3.44515200  | 2.12277900  | 0.04552600  |
| C  | 3.38011300  | -0.03648900 | 0.12225800  |
| H  | 4.44042800  | -0.03399500 | -0.14857800 |
| H  | 3.33552700  | -0.13265100 | 1.21514300  |
| C  | 2.74489700  | -1.26326200 | -0.53415500 |
| H  | 3.35658900  | -2.15012800 | -0.33109000 |
| H  | 2.68530800  | -1.13181300 | -1.61860600 |
| C  | 0.71797700  | -2.71373400 | -0.65948800 |
| H  | 0.84351100  | -2.63405900 | -1.74320600 |
| H  | 1.20376400  | -3.63362400 | -0.31894700 |
| C  | -0.58943300 | -0.14238400 | 2.61832000  |
| O  | -0.34041300 | -1.20999900 | 2.93071500  |
| Pd | 0.03914500  | 0.06751800  | -0.24879500 |

## Section S4(b). Cartesian coordinates of intermediates from hydride cycle

### Mo(II)-cyclam

[LMo]<sup>2+</sup>

Charge = 2 Multiplicity = 1

|    |             |             |             |
|----|-------------|-------------|-------------|
| N  | 1.32325900  | -1.42657000 | 0.44048000  |
| N  | 1.32325900  | 1.42657000  | 0.44048000  |
| N  | -1.39241200 | 1.56798800  | -0.11033900 |
| N  | -1.39241200 | -1.56798800 | -0.11033900 |
| H  | 1.31513200  | -1.21904000 | 1.44000600  |
| H  | 1.31513200  | 1.21904000  | 1.44000600  |
| H  | -1.55574900 | 1.91474200  | -1.06713900 |
| H  | -1.55575000 | -1.91474200 | -1.06713900 |
| C  | 0.72878000  | -2.77088300 | 0.25018900  |
| H  | 1.24132300  | -3.53147400 | 0.85273300  |
| H  | 0.83952500  | -3.04125400 | -0.80562300 |
| C  | 2.72418400  | -1.29998000 | -0.03732500 |
| H  | 2.70729000  | -1.33520100 | -1.13362400 |
| H  | 3.31653200  | -2.15641700 | 0.31140500  |
| C  | 3.37155900  | 0.00000000  | 0.45166300  |
| H  | 4.41493600  | 0.00000000  | 0.12080500  |
| H  | 3.38971900  | 0.00000000  | 1.55050100  |
| C  | 2.72418400  | 1.29998000  | -0.03732500 |
| H  | 3.31653200  | 2.15641700  | 0.31140500  |
| H  | 2.70729000  | 1.33520100  | -1.13362400 |
| C  | 0.72878000  | 2.77088300  | 0.25018900  |
| H  | 0.83952600  | 3.04125400  | -0.80562300 |
| H  | 1.24132300  | 3.53147400  | 0.85273300  |
| C  | -0.73618300 | 2.68606200  | 0.63819200  |
| H  | -1.24902200 | 3.63668200  | 0.45361000  |
| H  | -0.81850900 | 2.45720000  | 1.70521100  |
| C  | -2.74217900 | 1.27656500  | 0.45246500  |
| H  | -2.62669000 | 1.17667300  | 1.53643500  |
| H  | -3.39891500 | 2.13589300  | 0.26709000  |
| C  | -3.36170500 | 0.00000000  | -0.10902100 |
| H  | -4.42327400 | 0.00000000  | 0.16194100  |
| H  | -3.31704600 | 0.00000000  | -1.20649300 |
| C  | -2.74217900 | -1.27656500 | 0.45246500  |
| H  | -3.39891500 | -2.13589300 | 0.26709000  |
| H  | -2.62669000 | -1.17667300 | 1.53643500  |
| C  | -0.73618300 | -2.68606200 | 0.63819200  |
| H  | -0.81850900 | -2.45720000 | 1.70521100  |
| H  | -1.24902200 | -3.63668200 | 0.45361000  |
| Mo | 0.03827700  | 0.00000000  | -0.71588200 |

**[LMo]<sup>+</sup>**

Charge = 1 Multiplicity = 4

|    |             |             |             |
|----|-------------|-------------|-------------|
| N  | 1.41756100  | 1.66805400  | -0.31876400 |
| N  | 1.41756000  | -1.66805400 | -0.31876400 |
| N  | -1.41756000 | -1.66805300 | 0.31876400  |
| N  | -1.41756000 | 1.66805300  | 0.31876400  |
| H  | 1.55165800  | 1.79677400  | -1.32447600 |
| H  | 1.55165700  | -1.79677500 | -1.32447600 |
| H  | -1.55165500 | -1.79677000 | 1.32447700  |
| H  | -1.55165500 | 1.79677000  | 1.32447700  |
| C  | 0.74272900  | 2.89453000  | 0.20167900  |
| H  | 1.22638800  | 3.80442700  | -0.17611600 |
| H  | 0.83280000  | 2.89258400  | 1.29195900  |
| C  | 2.74673000  | 1.33620800  | 0.27089100  |
| H  | 2.63419500  | 1.30103700  | 1.35779600  |
| H  | 3.46242000  | 2.13652800  | 0.03447800  |
| C  | 3.32302300  | 0.00000000  | -0.25266000 |
| H  | 4.38491000  | -0.00000100 | 0.01925300  |
| H  | 3.29411000  | 0.00000000  | -1.35049300 |
| C  | 2.74672900  | -1.33620900 | 0.27089100  |
| H  | 3.46241900  | -2.13652800 | 0.03447800  |
| H  | 2.63419400  | -1.30103800 | 1.35779600  |
| C  | 0.74272800  | -2.89453100 | 0.20167900  |
| H  | 0.83279900  | -2.89258400 | 1.29195900  |
| H  | 1.22638700  | -3.80442800 | -0.17611500 |
| C  | -0.74272900 | -2.89453000 | -0.20167600 |
| H  | -1.22638900 | -3.80442600 | 0.17612000  |
| H  | -0.83280100 | -2.89258600 | -1.29195700 |
| C  | -2.74673100 | -1.33620800 | -0.27088800 |
| H  | -2.63419700 | -1.30103800 | -1.35779400 |
| H  | -3.46242000 | -2.13652800 | -0.03447400 |
| C  | -3.32302300 | 0.00000000  | 0.25266300  |
| H  | -4.38491100 | 0.00000100  | -0.01924900 |
| H  | -3.29411000 | 0.00000000  | 1.35049600  |
| C  | -2.74673000 | 1.33620800  | -0.27088800 |
| H  | -3.46241900 | 2.13652900  | -0.03447500 |
| H  | -2.63419700 | 1.30103800  | -1.35779400 |
| C  | -0.74272900 | 2.89453000  | -0.20167600 |
| H  | -0.83280000 | 2.89258600  | -1.29195700 |
| H  | -1.22638900 | 3.80442600  | 0.17611900  |
| Mo | 0.00000100  | 0.00000000  | -0.00000300 |

**[LMoH]<sup>2+</sup>**

Charge = 2 Multiplicity = 4

|   |             |             |             |
|---|-------------|-------------|-------------|
| N | 1.40608900  | 1.64075500  | -0.35922900 |
| N | 1.40608500  | -1.64075400 | -0.35922800 |
| N | -1.42971700 | -1.69959700 | 0.32057700  |
| N | -1.42971800 | 1.69960100  | 0.32056900  |
| H | 1.49882500  | 1.73873600  | -1.37304400 |
| H | 1.49880100  | -1.73871600 | -1.37304700 |
| H | -1.62285900 | -1.87092500 | 1.30794800  |

|    |             |             |             |
|----|-------------|-------------|-------------|
| H  | -1.62287100 | 1.87092700  | 1.30793800  |
| C  | 0.75508800  | 2.88210500  | 0.16117100  |
| H  | 1.25375100  | 3.77762800  | -0.22606800 |
| H  | 0.85312800  | 2.88029000  | 1.25073000  |
| C  | 2.75570500  | 1.32742300  | 0.19407300  |
| H  | 2.66513800  | 1.29201200  | 1.28373600  |
| H  | 3.44711700  | 2.14008500  | -0.06007900 |
| C  | 3.33043900  | -0.00000200 | -0.34157600 |
| H  | 4.39424800  | -0.00000300 | -0.08148100 |
| H  | 3.28600300  | 0.00000400  | -1.43917900 |
| C  | 2.75570800  | -1.32743400 | 0.19405800  |
| H  | 3.44711500  | -2.14009400 | -0.06011700 |
| H  | 2.66515700  | -1.29204100 | 1.28372300  |
| C  | 0.75508500  | -2.88210700 | 0.16116200  |
| H  | 0.85313100  | -2.88030200 | 1.25072100  |
| H  | 1.25374500  | -3.77762700 | -0.22608800 |
| C  | -0.72502000 | -2.89498700 | -0.24152600 |
| H  | -1.19974700 | -3.82166700 | 0.09684100  |
| H  | -0.81082700 | -2.84972600 | -1.33195200 |
| C  | -2.71165700 | -1.32972600 | -0.35515200 |
| H  | -2.50899500 | -1.26214000 | -1.42944500 |
| H  | -3.44226700 | -2.13340000 | -0.20604000 |
| C  | -3.31491300 | 0.00000400  | 0.15295600  |
| H  | -4.35994600 | 0.00000400  | -0.17452700 |
| H  | -3.34079900 | 0.00001400  | 1.25051300  |
| C  | -2.71164500 | 1.32972000  | -0.35517500 |
| H  | -3.44225700 | 2.13339900  | -0.20609400 |
| H  | -2.50896500 | 1.26210900  | -1.42946300 |
| C  | -0.72501500 | 2.89499100  | -0.24152600 |
| H  | -0.81081600 | 2.84973500  | -1.33195300 |
| H  | -1.19974100 | 3.82167100  | 0.09684200  |
| H  | 0.15547200  | -0.00000100 | 1.83047500  |
| Mo | -0.0250800  | 0.00000200  | 0.10855900  |

**[LMoH]<sup>+</sup>**

Charge = 1 Multiplicity = 3

|   |             |             |             |
|---|-------------|-------------|-------------|
| N | -1.40036900 | 1.62280100  | 0.36134300  |
| N | -1.39993600 | -1.62314300 | 0.36139100  |
| N | 1.45090100  | -1.71454600 | -0.34154100 |
| N | 1.45048500  | 1.71496500  | -0.34154300 |
| H | -1.48947500 | 1.71835800  | 1.37604500  |
| H | -1.48906000 | -1.71871800 | 1.37608900  |
| H | 1.71885200  | -1.94927100 | -1.29694000 |
| H | 1.71881300  | 1.94988500  | -1.29678600 |
| C | -0.76217700 | 2.87120100  | -0.14016500 |
| H | -1.24919000 | 3.76339600  | 0.27790300  |
| H | -0.87800600 | 2.89840800  | -1.22715000 |
| C | -2.76178000 | 1.33095500  | -0.16112100 |
| H | -2.70033500 | 1.30665500  | -1.25314500 |
| H | -3.45127000 | 2.14046500  | 0.11920800  |
| C | -3.33133300 | -0.00042900 | 0.37437500  |
| H | -4.39989000 | -0.00058000 | 0.13149900  |
| H | -3.27138300 | -0.00041900 | 1.47204800  |
| C | -2.76140100 | -1.33165300 | -0.16111700 |
| H | -3.45068300 | -2.14135100 | 0.11918700  |

|    |             |             |             |
|----|-------------|-------------|-------------|
| H  | -2.69993200 | -1.30733200 | -1.25313800 |
| C  | -0.76141400 | -2.87138400 | -0.14008000 |
| H  | -0.87724600 | -2.89865900 | -1.22706300 |
| H  | -1.24817300 | -3.76370100 | 0.27802800  |
| C  | 0.72556300  | -2.88324700 | 0.24203700  |
| H  | 1.18047400  | -3.82978600 | -0.07495000 |
| H  | 0.81569000  | -2.82164500 | 1.33178100  |
| C  | 2.69211700  | -1.32768400 | 0.38939000  |
| H  | 2.43430600  | -1.23895200 | 1.45132300  |
| H  | 3.44250200  | -2.12544400 | 0.30138300  |
| C  | 3.31455900  | 0.00042700  | -0.10185900 |
| H  | 4.35067700  | 0.00060600  | 0.25532000  |
| H  | 3.37279600  | 0.00063200  | -1.19851700 |
| C  | 2.69144700  | 1.32807500  | 0.38983000  |
| H  | 3.44162600  | 2.12612100  | 0.30263500  |
| H  | 2.43311100  | 1.23871600  | 1.45158400  |
| C  | 0.72479600  | 2.88348400  | 0.24197200  |
| H  | 0.81492300  | 2.82197900  | 1.33172000  |
| H  | 1.17943800  | 3.83013500  | -0.07506600 |
| H  | -0.41204300 | -0.00020300 | -1.88591100 |
| Mo | 0.03294400  | 0.00004000  | -0.15867200 |

### **W(III)-cyclam**

**[LW]<sup>3+</sup>**

Charge = 3 Multiplicity = 4

3 4

|   |             |             |             |
|---|-------------|-------------|-------------|
| N | 1.67480400  | -1.22673300 | 0.33668200  |
| N | 0.99657700  | 1.56332800  | 0.67547500  |
| N | -1.79082700 | 1.43879600  | -0.19663300 |
| N | -1.02464100 | -1.80832500 | 0.13518900  |
| H | 1.61927600  | -1.01857000 | 1.33892400  |
| H | 1.03880300  | 1.33216700  | 1.67127800  |
| H | -1.98359300 | 1.90397700  | -1.08497600 |
| H | -1.22612800 | -2.22554900 | -0.78438400 |
| C | 1.29060100  | -2.65864600 | 0.22678900  |
| H | 1.99053700  | -3.29667600 | 0.77697100  |
| H | 1.30107600  | -2.95007200 | -0.82738700 |
| C | 3.03642100  | -0.80248400 | -0.08555700 |
| H | 3.07045600  | -0.78188100 | -1.17848900 |
| H | 3.77742000  | -1.52718400 | 0.27128000  |
| C | 3.34269700  | 0.57484500  | 0.51819400  |
| H | 4.34596900  | 0.86858600  | 0.19426100  |
| H | 3.38329600  | 0.48329700  | 1.61196400  |
| C | 2.40120100  | 1.72632300  | 0.14692000  |
| H | 2.80175500  | 2.66352900  | 0.54630900  |
| H | 2.31980400  | 1.83360200  | -0.94052200 |
| C | 0.17438500  | 2.80638000  | 0.50203100  |
| H | 0.32944200  | 3.16088500  | -0.52177800 |
| H | 0.52146900  | 3.58171000  | 1.19123500  |

|   |             |             |             |
|---|-------------|-------------|-------------|
| C | -1.29199600 | 2.49141000  | 0.75136500  |
| H | -1.89069900 | 3.40275700  | 0.65912800  |
| H | -1.41390700 | 2.10496900  | 1.76642100  |
| C | -3.08169600 | 0.82421100  | 0.27496200  |
| H | -3.14466500 | 0.98217900  | 1.35445800  |
| H | -3.90771100 | 1.37428500  | -0.18480100 |
| C | -3.25321000 | -0.67066400 | -0.01054100 |
| H | -4.29016100 | -0.90949900 | 0.24903700  |
| H | -3.15392300 | -0.87995900 | -1.08404700 |
| C | -2.35511200 | -1.62216200 | 0.79182700  |
| H | -2.82685600 | -2.60698200 | 0.87122300  |
| H | -2.17757100 | -1.24566400 | 1.80293200  |
| C | -0.10787500 | -2.77157500 | 0.82847800  |
| H | -0.08639600 | -2.50025700 | 1.88792200  |
| H | -0.50124600 | -3.78716100 | 0.73498800  |
| W | 0.00242800  | 0.01192200  | -0.54924000 |

**[LW]<sup>2+</sup>**

Charge = 2 Multiplicity = 1

|   |             |             |             |
|---|-------------|-------------|-------------|
| N | 1.32864300  | -1.44681100 | 0.53760000  |
| N | 1.32863500  | 1.44681500  | 0.53760300  |
| N | -1.38753100 | 1.57779300  | -0.00370000 |
| N | -1.38752400 | -1.57779800 | -0.00369800 |
| H | 1.32486900  | -1.23966600 | 1.53769600  |
| H | 1.32486000  | 1.23966900  | 1.53769800  |
| H | -1.55548800 | 1.92555100  | -0.96379500 |
| H | -1.55548500 | -1.92555900 | -0.96379100 |
| C | 0.73231600  | -2.79600000 | 0.35489100  |
| H | 1.24429900  | -3.55153200 | 0.96274100  |
| H | 0.84233500  | -3.06792300 | -0.69994600 |
| C | 2.73198500  | -1.30575300 | 0.05771400  |
| H | 2.71694000  | -1.33918600 | -1.03782500 |
| H | 3.32849900  | -2.15755800 | 0.40875100  |
| C | 3.36647100  | 0.00000700  | 0.55480500  |
| H | 4.41468800  | 0.00001000  | 0.24010100  |
| H | 3.36914500  | 0.00000400  | 1.65392300  |
| C | 2.73197900  | 1.30576600  | 0.05772000  |
| H | 3.32848700  | 2.15757200  | 0.40876300  |
| H | 2.71693600  | 1.33920400  | -1.03781900 |
| C | 0.73230300  | 2.79600200  | 0.35489300  |
| H | 0.84232400  | 3.06792600  | -0.69994400 |
| H | 1.24428300  | 3.55153500  | 0.96274400  |
| C | -0.73391300 | 2.70697900  | 0.74352000  |
| H | -1.25249200 | 3.65129000  | 0.54824400  |
| H | -0.81895400 | 2.48036600  | 1.81000700  |
| C | -2.74130400 | 1.27960100  | 0.55946200  |
| H | -2.62320000 | 1.18005000  | 1.64236500  |
| H | -3.39852900 | 2.13696600  | 0.37042500  |
| C | -3.34871800 | -0.00000800 | -0.00986300 |
| H | -4.41587000 | -0.00001100 | 0.23764200  |
| H | -3.27646800 | -0.00001100 | -1.10579900 |
| C | -2.74129400 | -1.27960700 | 0.55947100  |
| H | -3.39851600 | -2.13697700 | 0.37044800  |
| H | -2.62318200 | -1.18004500 | 1.64237200  |

|   |             |             |             |
|---|-------------|-------------|-------------|
| C | -0.73390000 | -2.70698200 | 0.74352200  |
| H | -0.81893900 | -2.48036800 | 1.81000800  |
| H | -1.25247600 | -3.65129500 | 0.54824700  |
| W | 0.01541700  | 0.00000000  | -0.56101000 |

**[LW-H]<sup>3+</sup>**

Charge = 3 Multiplicity = 1

|   |             |             |             |
|---|-------------|-------------|-------------|
| N | 1.28958000  | -1.43843800 | 0.55450800  |
| N | 1.31971800  | 1.42057200  | 0.54632500  |
| N | -1.36805100 | 1.57433000  | 0.03410900  |
| N | -1.40486900 | -1.55535600 | 0.02002200  |
| H | 1.25608300  | -1.22044700 | 1.55690700  |
| H | 1.29472700  | 1.20742900  | 1.54979600  |
| H | -1.51273000 | 1.87922700  | -0.94264100 |
| H | -1.53246400 | -1.85945600 | -0.95920400 |
| C | 0.69360200  | -2.79483600 | 0.36942500  |
| H | 1.21338000  | -3.52954400 | 0.99165100  |
| H | 0.81913100  | -3.07109100 | -0.68154200 |
| C | 2.71174800  | -1.32223200 | 0.10656500  |
| H | 2.71413800  | -1.37913500 | -0.98715000 |
| H | 3.26568200  | -2.18492500 | 0.49162100  |
| C | 3.35792500  | -0.02550200 | 0.59607300  |
| H | 4.40389700  | -0.03816100 | 0.27541300  |
| H | 3.36465800  | -0.01208000 | 1.69404200  |
| C | 2.73162300  | 1.26938900  | 0.07781500  |
| H | 3.30637200  | 2.13245200  | 0.43018800  |
| H | 2.71729500  | 1.29619200  | -1.01729900 |
| C | 0.74731600  | 2.78727100  | 0.36196600  |
| H | 0.86922100  | 3.05833600  | -0.69078300 |
| H | 1.28372300  | 3.51474400  | 0.97836400  |
| C | -0.71335700 | 2.72099400  | 0.75520600  |
| H | -1.23417600 | 3.65271000  | 0.52023800  |
| H | -0.81136300 | 2.52717800  | 1.82654500  |
| C | -2.73032400 | 1.28869500  | 0.59077700  |
| H | -2.62004500 | 1.18557600  | 1.67378200  |
| H | -3.35570300 | 2.16561900  | 0.39632300  |
| C | -3.36228500 | 0.03331400  | 0.00281900  |
| H | -4.42430900 | 0.04668800  | 0.26856000  |
| H | -3.31403600 | 0.05031000  | -1.09362300 |
| C | -2.77570700 | -1.26079900 | 0.55052900  |
| H | -3.41544900 | -2.11385800 | 0.30388200  |
| H | -2.69400700 | -1.20455400 | 1.63935400  |
| C | -0.76877800 | -2.70498500 | 0.75248300  |
| H | -0.86973800 | -2.50253400 | 1.82199000  |
| H | -1.29919300 | -3.63245300 | 0.52181400  |
| H | 0.18048000  | 0.00091400  | -2.29101600 |
| W | 0.02958400  | 0.00101700  | -0.55870100 |



**[LW-H]<sup>2+</sup>**

Charge = 2 Multiplicity = 2

|   |             |             |             |
|---|-------------|-------------|-------------|
| N | 1.39601300  | -1.64373900 | 0.39274000  |
| N | 1.39601100  | 1.64374000  | 0.39274000  |
| N | -1.42354100 | 1.70858800  | -0.29363800 |
| N | -1.42353900 | -1.70859000 | -0.29363800 |
| H | 1.49155600  | -1.74323300 | 1.40722700  |
| H | 1.49155400  | 1.74323500  | 1.40722700  |
| H | -1.64237100 | 1.90171300  | -1.27236000 |
| H | -1.64237000 | -1.90171500 | -1.27235900 |
| C | 0.75646600  | -2.89588700 | -0.12208000 |
| H | 1.25891300  | -3.78425900 | 0.27560700  |
| H | 0.85879900  | -2.89785500 | -1.21089900 |
| C | 2.75048700  | -1.32834900 | -0.15586400 |
| H | 2.66050500  | -1.29083600 | -1.24530200 |
| H | 3.43995200  | -2.14187700 | 0.10065200  |
| C | 3.31997700  | 0.00000200  | 0.38429500  |
| H | 4.38625800  | 0.00000300  | 0.13466200  |
| H | 3.26348200  | 0.00000200  | 1.48115300  |
| C | 2.75048600  | 1.32835300  | -0.15586400 |
| H | 3.43994900  | 2.14188100  | 0.10065200  |
| H | 2.66050300  | 1.29083900  | -1.24530200 |
| C | 0.75646200  | 2.89588800  | -0.12208000 |
| H | 0.85879500  | 2.89785600  | -1.21089800 |
| H | 1.25890800  | 3.78426100  | 0.27560800  |
| C | -0.72382900 | 2.90649200  | 0.27675200  |
| H | -1.20182800 | 3.83279800  | -0.05628500 |
| H | -0.80927800 | 2.84942800  | 1.36623900  |
| C | -2.69549000 | 1.32840900  | 0.40064200  |
| H | -2.47125200 | 1.25092500  | 1.46972000  |
| H | -3.42939100 | 2.13249900  | 0.27074400  |
| C | -3.30119700 | -0.00000200 | -0.10758600 |
| H | -4.34628100 | -0.00000300 | 0.21995000  |
| H | -3.32448200 | -0.00000300 | -1.20490000 |
| C | -2.69548700 | -1.32841100 | 0.40064500  |
| H | -3.42938700 | -2.13250300 | 0.27075000  |
| H | -2.47124600 | -1.25092400 | 1.46972100  |
| C | -0.72382500 | -2.90649300 | 0.27675100  |
| H | -0.80927400 | -2.84943000 | 1.36623900  |
| H | -1.20182300 | -3.83280000 | -0.05628600 |
| H | 0.09220300  | 0.00000000  | -1.85826200 |
| W | -0.01569300 | 0.00000000  | -0.11924800 |

**Co(II)-cyclam**

**[LCo]<sup>2+</sup>**

Charge = 2 Multiplicity = 2

|   |             |             |             |
|---|-------------|-------------|-------------|
| N | 1.33664900  | 1.46900800  | -0.29097800 |
| N | 1.33671700  | -1.46893700 | -0.29103700 |
| N | -1.33663700 | -1.46901200 | 0.29103200  |
| N | -1.33671000 | 1.46897100  | 0.29096100  |
| H | 1.43306900  | 1.56259600  | -1.30637200 |
| H | 1.43298500  | -1.56249800 | -1.30645000 |

|    |             |             |             |
|----|-------------|-------------|-------------|
| H  | -1.43290300 | -1.56265900 | 1.30643600  |
| H  | -1.43303100 | 1.56263700  | 1.30635900  |
| C  | 0.72652900  | 2.73135900  | 0.20820800  |
| H  | 1.25853900  | 3.60690300  | -0.17764900 |
| H  | 0.80738800  | 2.72876500  | 1.29967400  |
| C  | 2.70473400  | 1.27270800  | 0.25697400  |
| H  | 2.61460900  | 1.22886800  | 1.34714400  |
| H  | 3.31606600  | 2.14708600  | 0.00433900  |
| C  | 3.35939300  | 0.00009800  | -0.26520700 |
| H  | 4.40548900  | 0.00012100  | 0.05680000  |
| H  | 3.36426600  | 0.00021900  | -1.36352300 |
| C  | 2.70489300  | -1.27269600 | 0.25671300  |
| H  | 3.31622900  | -2.14696900 | 0.00372900  |
| H  | 2.61496800  | -1.22916300 | 1.34691100  |
| C  | 0.72666700  | -2.73130600 | 0.20819400  |
| H  | 0.80758400  | -2.72869300 | 1.29965600  |
| H  | 1.25868700  | -3.60683700 | -0.17767900 |
| C  | -0.72653900 | -2.73131600 | -0.20830300 |
| H  | -1.25852700 | -3.60689900 | 0.17749800  |
| H  | -0.80745500 | -2.72861800 | -1.29976500 |
| C  | -2.70481800 | -1.27277500 | -0.25670800 |
| H  | -2.61488900 | -1.22914000 | -1.34690200 |
| H  | -3.31612000 | -2.14709700 | -0.00380700 |
| C  | -3.35937500 | -0.00005600 | 0.26532700  |
| H  | -4.40549400 | -0.00009000 | -0.05660600 |
| H  | -3.36417200 | 0.00000300  | 1.36364300  |
| C  | -2.70484900 | 1.27262700  | -0.25683700 |
| H  | -3.31619800 | 2.14695400  | -0.00407000 |
| H  | -2.61485700 | 1.22886600  | -1.34702100 |
| C  | -0.72665500 | 2.73129800  | -0.20836900 |
| H  | -0.80751200 | 2.72857400  | -1.29983500 |
| H  | -1.25871000 | 3.60686000  | 0.17738800  |
| Co | -0.00000100 | 0.00001300  | 0.00001100  |

**[LCo]<sup>+</sup>**

Charge = 1 Multiplicity = 3

|   |             |             |             |
|---|-------------|-------------|-------------|
| N | -1.39993400 | 1.58244700  | 0.32153300  |
| N | -1.39993400 | -1.58244700 | 0.32153300  |
| N | 1.39993400  | -1.58244800 | -0.32153300 |
| N | 1.39993400  | 1.58244800  | -0.32153300 |
| H | -1.53186700 | 1.71439300  | 1.32587800  |
| H | -1.53186700 | -1.71439300 | 1.32587800  |
| H | 1.53186700  | -1.71439400 | -1.32587800 |
| H | 1.53186700  | 1.71439400  | -1.32587800 |
| C | -0.73671600 | 2.79304600  | -0.20632600 |
| H | -1.22303700 | 3.71888000  | 0.13266600  |
| H | -0.80742700 | 2.76250800  | -1.29955800 |
| C | -2.72656500 | 1.30486800  | -0.26692000 |
| H | -2.59722700 | 1.23900600  | -1.35319800 |
| H | -3.42186300 | 2.13668300  | -0.07198600 |
| C | -3.34441800 | 0.00000000  | 0.25578400  |
| H | -4.40117500 | 0.00000000  | -0.03499500 |
| H | -3.32912900 | 0.00000000  | 1.35489400  |
| C | -2.72656500 | -1.30486800 | -0.26691900 |

|    |             |             |             |
|----|-------------|-------------|-------------|
| H  | -3.42186300 | -2.13668300 | -0.07198500 |
| H  | -2.59722700 | -1.23900600 | -1.35319700 |
| C  | -0.73671600 | -2.79304600 | -0.20632600 |
| H  | -0.80742800 | -2.76250800 | -1.29955800 |
| H  | -1.22303700 | -3.71888000 | 0.13266600  |
| C  | 0.73671600  | -2.79304600 | 0.20632700  |
| H  | 1.22303700  | -3.71888000 | -0.13266500 |
| H  | 0.80742800  | -2.76250700 | 1.29955900  |
| C  | 2.72656500  | -1.30486800 | 0.26691900  |
| H  | 2.59722700  | -1.23900600 | 1.35319700  |
| H  | 3.42186300  | -2.13668300 | 0.07198500  |
| C  | 3.34441800  | 0.00000000  | -0.25578500 |
| H  | 4.40117500  | 0.00000000  | 0.03499500  |
| H  | 3.32912800  | 0.00000000  | -1.35489400 |
| C  | 2.72656500  | 1.30486800  | 0.26691900  |
| H  | 3.42186300  | 2.13668300  | 0.07198600  |
| H  | 2.59722700  | 1.23900600  | 1.35319700  |
| C  | 0.73671600  | 2.79304600  | 0.20632700  |
| H  | 0.80742700  | 2.76250700  | 1.29955900  |
| H  | 1.22303700  | 3.71888000  | -0.13266500 |
| Co | 0.00000000  | 0.00000000  | -0.00000100 |

**[LCo-H]<sup>2+</sup>**

Charge = 2 Multiplicity = 1

|   |             |             |             |
|---|-------------|-------------|-------------|
| N | 1.32014700  | 1.45565500  | -0.29185100 |
| N | 1.32025600  | -1.45558600 | -0.29178200 |
| N | -1.33936700 | -1.45438500 | 0.28755700  |
| N | -1.33948600 | 1.45428700  | 0.28768000  |
| H | 1.38209000  | 1.55455100  | -1.31099300 |
| H | 1.38225000  | -1.55455000 | -1.31091400 |
| H | -1.45242200 | -1.51622700 | 1.30232200  |
| H | -1.45230600 | 1.51614600  | 1.30247000  |
| C | 0.72473100  | 2.71312800  | 0.23657200  |
| H | 1.26246800  | 3.58762300  | -0.14243500 |
| H | 0.81576900  | 2.68825000  | 1.32595500  |
| C | 2.70704100  | 1.26835300  | 0.21181800  |
| H | 2.65196900  | 1.23041800  | 1.30348100  |
| H | 3.29861300  | 2.14686200  | -0.06972700 |
| C | 3.35073300  | 0.00010200  | -0.32819800 |
| H | 4.40431600  | 0.00014800  | -0.03225700 |
| H | 3.32744300  | 0.00004700  | -1.42605400 |
| C | 2.70711200  | -1.26813400 | 0.21193600  |
| H | 3.29875700  | -2.14663400 | -0.06948400 |
| H | 2.65198400  | -1.23008100 | 1.30359300  |
| C | 0.72492200  | -2.71307500 | 0.23670300  |
| H | 0.81588100  | -2.68809700 | 1.32609100  |
| H | 1.26276900  | -3.58755000 | -0.14219300 |
| C | -0.72802200 | -2.73054500 | -0.17307100 |
| H | -1.25866100 | -3.59071000 | 0.24599800  |
| H | -0.81521800 | -2.76478600 | -1.26326700 |
| C | -2.69448100 | -1.26722800 | -0.29702900 |
| H | -2.57778500 | -1.22642900 | -1.38468100 |
| H | -3.30048100 | -2.14777700 | -0.05490700 |
| C | -3.36895000 | -0.00017100 | 0.20792100  |
| H | -4.40419100 | -0.00020400 | -0.14656300 |

|    |             |             |             |
|----|-------------|-------------|-------------|
| H  | -3.40593700 | -0.00038400 | 1.30539500  |
| C  | -2.69475400 | 1.26719900  | -0.29658900 |
| H  | -3.30079100 | 2.14756800  | -0.05391000 |
| H  | -2.57836900 | 1.22690200  | -1.38429100 |
| C  | -0.72824200 | 2.73044400  | -0.17310500 |
| H  | -0.81550300 | 2.76456600  | -1.26330100 |
| H  | -1.25890900 | 3.59062300  | 0.24590200  |
| H  | 0.31385100  | -0.00002900 | 1.38416200  |
| Co | 0.00077900  | -0.00001700 | 0.00172700  |

**[LCo-H]<sup>+</sup>**

Charge = 1 Multiplicity = 2

|    |             |             |             |
|----|-------------|-------------|-------------|
| N  | 1.33209600  | 1.45943300  | -0.30733900 |
| N  | 1.33210400  | -1.45942900 | -0.30733900 |
| N  | -1.36580000 | -1.49492500 | 0.26584100  |
| N  | -1.36580800 | 1.49492000  | 0.26584200  |
| H  | 1.38269900  | 1.50675300  | -1.32868700 |
| H  | 1.38270800  | -1.50675200 | -1.32868600 |
| H  | -1.48585800 | -1.61969700 | 1.27215500  |
| H  | -1.48585800 | 1.61969000  | 1.27215700  |
| C  | 0.72694900  | 2.73012700  | 0.16116000  |
| H  | 1.25768900  | 3.59976000  | -0.24320200 |
| H  | 0.80660900  | 2.74999400  | 1.25222400  |
| C  | 2.71766000  | 1.28066600  | 0.18749400  |
| H  | 2.66910200  | 1.25247700  | 1.28018700  |
| H  | 3.32185700  | 2.14916400  | -0.10452500 |
| C  | 3.35497100  | 0.00000700  | -0.34414100 |
| H  | 4.41034500  | 0.00001000  | -0.05285800 |
| H  | 3.33113500  | 0.00000700  | -1.44272900 |
| C  | 2.71766600  | -1.28065400 | 0.18749600  |
| H  | 3.32186800  | -2.14914900 | -0.10452100 |
| H  | 2.66910700  | -1.25246300 | 1.28018800  |
| C  | 0.72696200  | -2.73012500 | 0.16116300  |
| H  | 0.80662100  | -2.74998800 | 1.25222700  |
| H  | 1.25770600  | -3.59975700 | -0.24319700 |
| C  | -0.72897400 | -2.72974600 | -0.26091700 |
| H  | -1.24800000 | -3.62865900 | 0.08998900  |
| H  | -0.79864500 | -2.69925200 | -1.35348400 |
| C  | -2.71184700 | -1.27691500 | -0.31544200 |
| H  | -2.59517400 | -1.21952900 | -1.40308700 |
| H  | -3.34638700 | -2.14448100 | -0.09344600 |
| C  | -3.36806900 | -0.00000800 | 0.20164800  |
| H  | -4.41260000 | -0.00001100 | -0.12640300 |
| H  | -3.38112300 | -0.00001300 | 1.29995400  |
| C  | -2.71185900 | 1.27690900  | -0.31543100 |
| H  | -3.34640200 | 2.14446800  | -0.09341800 |
| H  | -2.59519700 | 1.21953700  | -1.40307800 |
| C  | -0.72898800 | 2.72974200  | -0.26091900 |
| H  | -0.79865900 | 2.69924500  | -1.35348600 |
| H  | -1.24801600 | 3.62865400  | 0.08998600  |
| H  | 0.33707300  | -0.00000200 | 1.91745500  |
| Co | 0.01083100  | -0.00000100 | 0.14209500  |

## References

1. R. Casanovas, J. Ortega-Castro, J. Frau, J. Donoso and F. Munoz, *Int. J. Quantum Chem*, 2014, **114**, 1350-1363.
2. A. J. Göttle and M. T. Koper, *Chem. Sci*, 2017, **8**, 458-465.
3. D. R. Lide, *CRC handbook of chemistry and physics*, CRC Boca Raton, 2012.
4. X.-J. Qi, Y. Fu, L. Liu and Q.-X. Guo, *Organometallics*, 2007, **26**, 4197-4203.
5. S. Chen, R. Rousseau, S. Raugei, M. Dupuis, D. L. DuBois and R. M. Bullock, *Organometallics*, 2011, **30**, 6108-6118.
6. C. A. Kelly, Q. G. Mulazzani, M. Venturi, E. L. Blinn and M. A. Rodgers, *J. Am. Chem. Soc.*, 1995, **117**, 4911-4919.
7. J. Ho, M. L. Coote, C. J. Cramer and D. G. Truhlar, *Organic Electrochemistry*, 2015, 229-259.
8. G. Tawa, I. Topol, S. Burt, R. Caldwell and A. Rashin, *J. Chem. Phys.*, 1998, **109**, 4852-4863.
9. C. P. Kelly, C. J. Cramer and D. G. Truhlar, *J. Phys. Chem. B.*, 2006, **110**, 16066-16081.
